# Supplementary material for: Influence of misfit dislocations on ionic conductivity at oxide interfaces
Source: Royal Society of Chemistry journal article supplement (doi:10.1039/d4ta02034k), 2024-01-01

## **Influence of misfit dislocations on ionic conductivity at oxide interfaces**

William Ebmeyer,<sup>1</sup> Peter Hatton,<sup>2</sup> Blas P. Uberuaga,<sup>2</sup> and Pratik P. Dholabhai<sup>1\*</sup>

*<sup>1</sup>School of Physics and Astronomy  
Rochester Institute of Technology  
Rochester, NY 14623*

*<sup>2</sup>Materials Science and Technology Division  
Los Alamos National Laboratory  
Los Alamos, NM 87544*

\* Email: [pratik.dholabhai@rit.edu](mailto:pratik.dholabhai@rit.edu)

**Figure S1.** The proportion of time spent by oxygen vacancies at the top  $N$  atoms in (a)  $\text{TiO}_2\text{-BaO/SrO-ZrO}_2$  and (b)  $\text{SrO-BaO/TiO}_2\text{-ZrO}_2$  heterostructures. Data was aggregated from all simulations run at 3500 K.

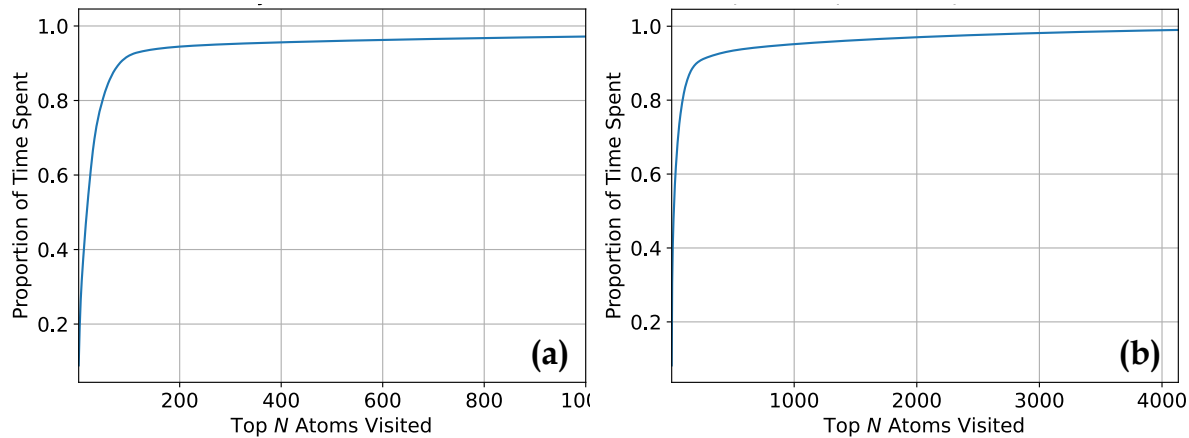

Supplement: d4ta02034k1.pdf [file d4ta02034k1.pdf]
